# Supplementary material for: Association of Plasminogen Activator Inhibitor-1 (PAI-1) Gene Polymorphisms with Osteoporotic Vertebral Compression Fractures (OVCFs) in Postmenopausal Women
Source: PubMed Central journal article supplement (PMC5187862; doi:10.3390/ijms17122062), 2016-12-09
Supplement: ijms-17-02062-s001.pdf [file ijms-17-02062-s001.pdf]

## Supplementary Materials: Association of Plasminogen Activator Inhibitor-1 (PAI-1) Gene Polymorphisms with Osteoporotic Vertebral Compression Fractures (OVCFs) in Postmenopausal Women

Jung Oh Kim, Soo Hong Han, Yeon Ho Lee, Tae Keun Ahn, Jae Joon Lim, Young Sun Chung, Dong Eun Shin, Woo Sik Lee, In Bo Han and Nam Keun Kim

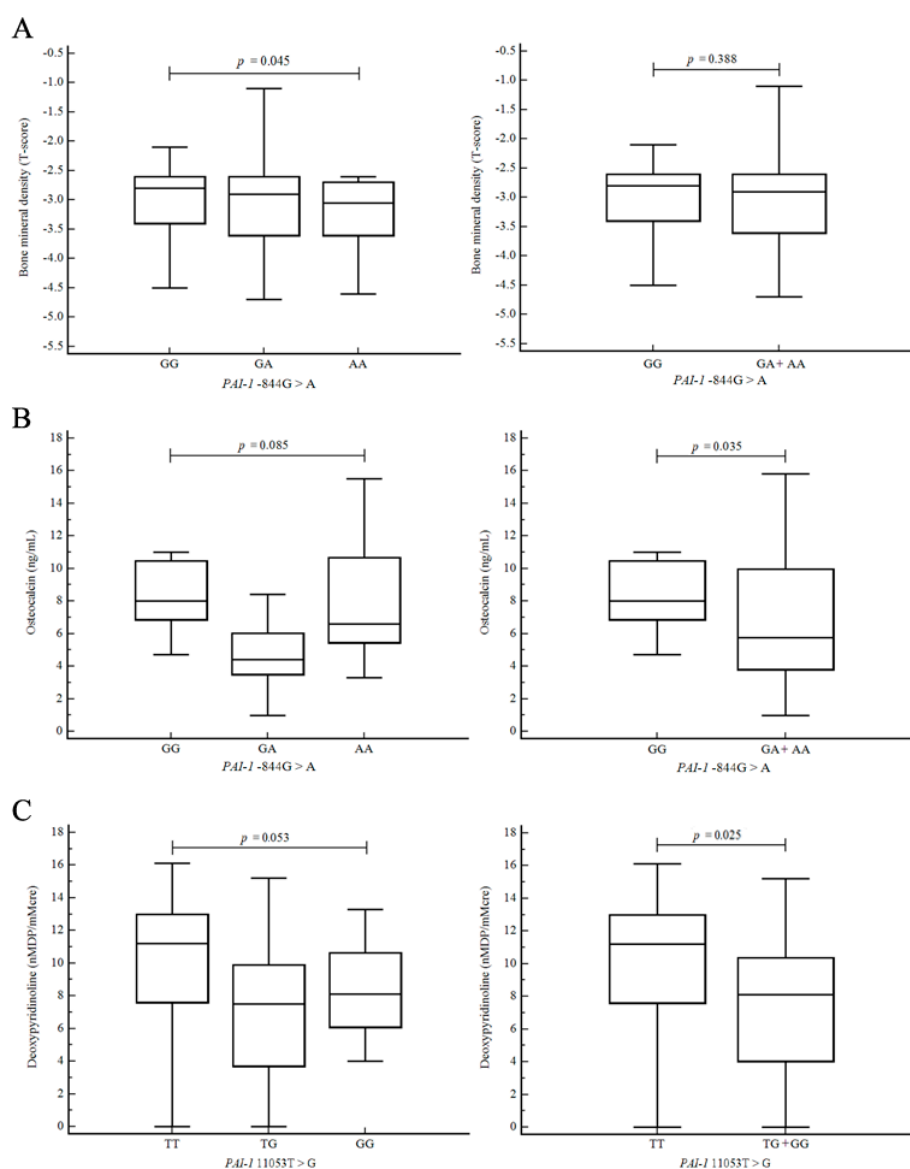

**Figure S1.** The bone mineral density (BMD), osteocalcin (bone Gla protein, BGP), and deoxypyridinoline (DPD) levels according to PAI-1 gene polymorphisms in OVCF patients. The statistical analysis was performed by Kruskal-Wallis or Mann-Whitney test for PAI-1 -844G > A, 11053T > G genotype, respectively. The black line in box was mean of factor value. (A) The BMD level: The BMD (T-score) of lumbar spine (L2–L4) is significantly different ( $p = 0.045$ ) between PAI-1 -844GG ( $-3.19 \pm 0.84$ ), GA ( $-2.90 \pm 1.01$ ) and AA genotype ( $-3.44 \pm 0.94$ ); (B) plasma BGP level: we found that PAI-1 -844G > A polymorphism is making a difference with plasma BGP level. The PAI-1 -844GA + AA genotype had a descend osteocalcin level ( $6.77 \pm 3.99$ ) compared with the -844GG genotype ( $11.78 \pm 10.67$ ); (C) plasma DPD level: the PAI-1 11053TG + GG genotype had a descend DPD level ( $7.14 \pm 4.18$ ) compared with the 11053TT genotype ( $12.15 \pm 7.79$ ).

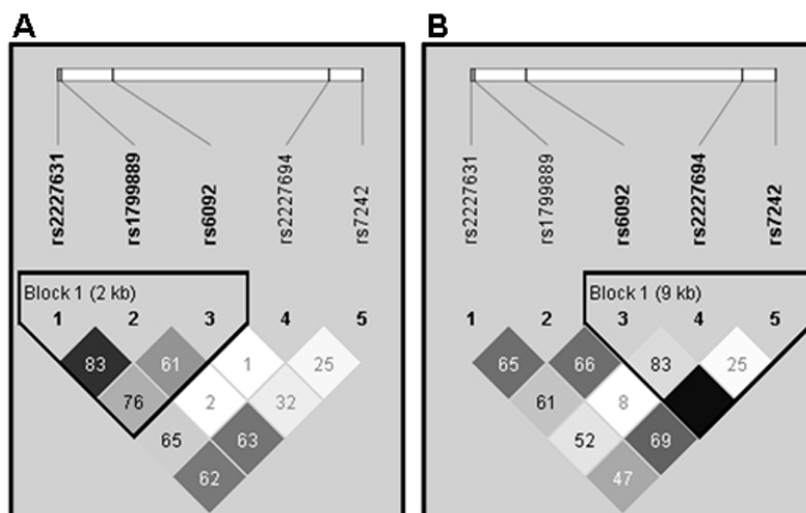

**Figure S2.** Linkage disequilibrium (LD) patterns of *PAI-1* gene SNPs. Values in squares represent the LD between single markers. The color of area were show “Linkage disequilibrium”, that high association with two loci as it gets darker. (A) Control individuals exhibited strong linkage disequilibrium between loci -844 and -675 ( $D' = 0.838$ ,  $LOD = 8.42$ ,  $r^2 = 0.153$ ), -844 and +43 ( $D' = 0.764$ ,  $LOD = 1.2$ ,  $r^2 = 0.02$ ); (B) whereas osteoporosis patients exhibited strong linkage disequilibrium between loci +43 and +11053 ( $D' = 1.000$ ,  $LOD = 4.51$ ,  $r^2 = 0.106$ ), +43 and +9785 ( $D' = 0.831$ ,  $LOD = 0.06$ ,  $r^2 = 0.002$ ).

**Table S1.** Baseline characteristics between OVCF and non-OVCF patients.

| Characteristic                                 | OVCF (n = 87)        | non-OVCF (n = 71)   | p       |
|------------------------------------------------|----------------------|---------------------|---------|
| Age (years, mean $\pm$ SD)                     | 70.23 $\pm$ 9.44     | 70.83 $\pm$ 6.53    | 0.846   |
| Hypertension (%)                               | 37 (42.5)            | 20 (28.2)           | 0.01    |
| SBP (mmHg, mean $\pm$ SD)                      | 129.99 $\pm$ 16.51   | 126.34 $\pm$ 13.89  | 0.183   |
| DBP (mmHg, mean $\pm$ SD)                      | 77.63 $\pm$ 10.57    | 74.72 $\pm$ 10.26   | 0.062   |
| Diabetes mellitus (%)                          | 11 (12.6)            | 17 (23.9)           | 0.58    |
| FBS (mg/dL, mean $\pm$ SD)                     | 135.89 $\pm$ 53.96   | 114.30 $\pm$ 26.15  | 0.003   |
| Hcy ( $\mu$ mol/L, mean $\pm$ SD)              | 10.01 $\pm$ 3.85     | 9.57 $\pm$ 4.31     | 0.499   |
| Folate (ng/mL, mean $\pm$ SD)                  | 6.54 $\pm$ 4.03      | 10.19 $\pm$ 4.91    | <0.0001 |
| BMI (kg/m <sup>2</sup> , mean $\pm$ SD)        | 23.87 $\pm$ 5.02     | 23.77 $\pm$ 2.79    | 0.222   |
| HDL-cholesterol (mg/dL, mean $\pm$ SD)         | 44.39 $\pm$ 15.95    | 44.83 $\pm$ 12.24   | 0.868   |
| LDL-cholesterol (mg/dL, mean $\pm$ SD)         | 117.87 $\pm$ 42.82   | 95.02 $\pm$ 32.02   | 0.002   |
| TG (mg/dL, mean $\pm$ SD)                      | 147.62 $\pm$ 74.17   | 132.23 $\pm$ 86.68  | 0.285   |
| Vitamin B12 (pg/mL, mean $\pm$ SD)             | 973.11 $\pm$ 1024.37 | 639.46 $\pm$ 384.93 | 0.028   |
| 25-(OH) Vitamin D (ng/mL, mean $\pm$ SD)       | 41.97 $\pm$ 34.20    | 18.57 $\pm$ 11.62   | <0.0001 |
| Osteocalcin (ng/mL, mean $\pm$ SD)             | 7.83 $\pm$ 6.39      | -                   | -       |
| Deoxy pyridinoline (nMDP/mMcre, mean $\pm$ SD) | 8.41 $\pm$ 5.55      | -                   | -       |
| BMD (g/cm <sup>2</sup> , mean $\pm$ SD)        | -2.98 $\pm$ 1.26     | -3.06 $\pm$ 0.97    | 0.394   |

Abbreviations: OVCF, osteoporotic vertebral compression fracture; SBP, systolic blood pressure; DBP, diastolic blood pressure; FBS, fasting blood sugar; Hcy, homocysteine; BMI, body mass index; HDL, high density lipoprotein; LDL, low density lipoprotein; TG, triglyceride; BMD, bone mineral density.

**Table S2.** Comparison of genotype frequencies and AOR values of *PAI-1* polymorphisms according to with/without fracture patients.

| Genotypes                        | non-OVCF (n = 71) | OVCF (n = 87) | AOR (95% CI) *      | p     |
|----------------------------------|-------------------|---------------|---------------------|-------|
| <i>PAI-1</i> -844                | -                 | -             | -                   | -     |
| GG                               | 22 (31.0)         | 18 (20.7)     | 1.000 (reference)   | -     |
| GA                               | 33 (46.5)         | 56 (64.4)     | 2.456 (1.063–5.676) | 0.036 |
| AA                               | 16 (22.5)         | 13 (14.9)     | 0.862 (0.274–2.716) | 0.800 |
| Dominant (GG vs. GA + AA)        | -                 | -             | 1.884 (0.848–4.183) | 0.120 |
| Recessive (GG + GA vs. AA)       | -                 | -             | 0.431 (0.170–1.094) | 0.077 |
| <i>PAI-1</i> -675 4G5G           | -                 | -             | -                   | -     |
| 4G4G                             | 33 (46.5)         | 36 (41.4)     | -                   | -     |
| 4G5G                             | 32 (45.1)         | 38 (43.7)     | 1.084 (0.527–2.230) | 0.827 |
| 5G5G                             | 6 (8.5)           | 13 (14.9)     | 1.578 (0.490–5.082) | 0.444 |
| Dominant (4G4G vs. 4G5G + 5G5G)  | -                 | -             | 1.207 (0.610–2.389) | 0.589 |
| Recessive (4G4G + 4G5G vs. 5G5G) | -                 | -             | 1.614 (0.535–4.869) | 0.395 |
| <i>PAI-1</i> +43                 | -                 | -             | -                   | -     |
| GG                               | 61 (85.9)         | 71 (81.6)     | -                   | -     |
| GA                               | 8 (11.3)          | 16 (18.4)     | 1.599 (0.589–4.341) | 0.357 |
| AA                               | 2 (2.8)           | 0 (0.0)       | N/A                 | 0.998 |
| Dominant (GG vs. GA + AA)        | -                 | -             | 1.286 (0.500–3.303) | 0.602 |
| Recessive (GG + GA vs. AA)       | -                 | -             | N/A                 | 0.998 |
| <i>PAI-1</i> +9785               | -                 | -             | -                   | -     |
| GG                               | 68 (95.8)         | 80 (92.0)     | -                   | -     |
| GA                               | 3 (4.2)           | 7 (8.0)       | 1.675 (0.385–7.293) | 0.492 |
| AA                               | 0 (0.0)           | 0 (0.0)       | N/A                 | -     |
| Dominant (GG vs. GA + AA)        | -                 | -             | 1.675 (0.385–7.293) | 0.492 |
| Recessive (GG + GA vs. AA)       | -                 | -             | N/A                 | -     |
| <i>PAI-1</i> +11053              | -                 | -             | -                   | -     |
| TT                               | 15 (21.1)         | 18 (20.7)     | -                   | -     |
| TG                               | 36 (50.7)         | 49 (56.3)     | 1.316 (0.534–3.246) | 0.551 |
| GG                               | 20 (28.2)         | 20 (23.0)     | 0.916 (0.326–2.575) | 0.868 |
| Dominant (TT vs. TG + GG)        | -                 | -             | 1.148 (0.494–2.666) | 0.748 |
| Recessive (TT + TG vs. GG)       | -                 | -             | 0.803 (0.373–1.728) | 0.575 |

\* The adjusted odds ratio on the basis of risk factors, such as age, hypertension, diabetes mellitus.

Abbreviations: AOR, adjusted odds ratio; N/A, not applicable.

**Table S3.** Comparison of genotype frequencies of the *PAI-1* gene 4 site haplotype in the context of OVCF in postmenopausal women and control subjects.

| Haplotype                           | Overall (2n = 710) | Control (2n = 394) | Case (2n = 316) | OR (95% CI)         | <i>p</i> <sup>a</sup> |
|-------------------------------------|--------------------|--------------------|-----------------|---------------------|-----------------------|
| <i>PAI-1</i> -844/-675/+43/+9785    |                    |                    |                 |                     |                       |
| G-4G-G-G                            | 0.274              | 0.332              | 0.194           | 1.000 (reference)   | -                     |
| G-4G-G-A                            | 0.011              | 0.024              | 0.000           | 0.102 (0.006–1.767) | 0.034                 |
| G-4G-A-G                            | 0.028              | 0.010              | 0.052           | 9.127 (2.945–28.28) | <0.0001               |
| G-4G-A-A                            | 0.005              | 0.000              | 0.008           | 10.69 (0.505–226.2) | 0.104                 |
| G-5G-G-G                            | 0.189              | 0.180              | 0.208           | 1.996 (1.270–3.139) | 0.003                 |
| G-5G-G-A                            | 0.008              | 0.008              | 0.000           | 0.306 (0.016–6.010) | 0.553                 |
| G-5G-A-G                            | 0.049              | 0.029              | 0.074           | 4.116 (1.922–8.814) | 0.000                 |
| G-5G-A-A                            | 0.000              | 0.003              | 0.000           | 0.713 (0.029–17.76) | 1.000                 |
| A-4G-G-G                            | 0.366              | 0.388              | 0.339           | 1.502 (1.015–2.222) | 0.049                 |
| A-4G-G-A                            | 0.011              | 0.006              | 0.021           | 7.516 (1.516–37.26) | 0.008                 |
| A-4G-A-G                            | 0.022              | 0.004              | 0.045           | 15.03 (3.312–68.24) | <0.0001               |
| A-5G-G-G                            | 0.021              | 0.016              | 0.027           | 2.863 (0.952–8.615) | 0.076                 |
| A-5G-A-G                            | 0.015              | 0.000              | 0.031           | 44.90 (2.587–779.3) | <0.0001               |
| A-5G-A-A                            | 0.001              | 0.000              | 0.003           | 6.415 (0.257–159.9) | 0.321                 |
| <i>PAI-1</i> -844/-675/+43/+11053   |                    |                    |                 |                     |                       |
| G-4G-G-T                            | 0.187              | 0.256              | 0.100           | 1.000 (reference)   | -                     |
| G-4G-G-G                            | 0.098              | 0.106              | 0.093           | 2.179 (1.174–4.044) | 0.016                 |
| G-4G-A-T                            | 0.015              | 0.000              | 0.035           | 71.83 (4.115–1254)  | <0.0001               |
| G-4G-A-G                            | 0.016              | 0.006              | 0.025           | 8.417 (2.106–33.64) | 0.002                 |
| G-5G-G-T                            | 0.166              | 0.163              | 0.169           | 2.614 (1.524–4.482) | 0.001                 |
| G-5G-G-G                            | 0.031              | 0.022              | 0.039           | 4.208 (1.625–10.90) | 0.004                 |
| G-5G-A-T                            | 0.041              | 0.030              | 0.061           | 4.997 (2.190–11.40) | 0.0002                |
| G-5G-A-G                            | 0.009              | 0.003              | 0.014           | 12.63 (1.361–117.1) | 0.017                 |
| A-4G-G-T                            | 0.069              | 0.079              | 0.061           | 1.934 (0.965–3.880) | 0.067                 |
| A-4G-G-G                            | 0.308              | 0.311              | 0.300           | 2.458 (1.521–3.971) | 0.0002                |
| A-4G-A-T                            | 0.003              | 0.003              | 0.000           | 1.041 (0.041–26.20) | 1.000                 |
| A-4G-A-G                            | 0.020              | 0.003              | 0.045           | 44.19 (5.588–349.4) | <0.0001               |
| A-5G-G-T                            | 0.010              | 0.000              | 0.020           | 40.60 (2.225–740.9) | 0.0000                |
| A-5G-G-G                            | 0.011              | 0.018              | 0.006           | 0.902 (0.178–4.563) | 1.000                 |
| A-5G-A-T                            | 0.015              | 0.000              | 0.033           | 65.58 (3.737–1151)  | <0.0001               |
| <i>PAI-1</i> -844/-675/+9785/+11053 |                    |                    |                 |                     |                       |
| G-4G-G-T                            | 0.190              | 0.235              | 0.132           | 1.000 (reference)   | -                     |
| G-4G-G-G                            | 0.108              | 0.107              | 0.121           | 2.003 (1.132–3.544) | 0.020                 |
| G-4G-A-T                            | 0.012              | 0.019              | 0.000           | 0.147 (0.008–2.629) | 0.105                 |
| G-4G-A-G                            | 0.007              | 0.007              | 0.002           | 0.314 (0.016–6.225) | 0.553                 |
| G-5G-G-T                            | 0.197              | 0.185              | 0.228           | 2.184 (1.340–3.560) | 0.002                 |
| G-5G-G-G                            | 0.039              | 0.021              | 0.049           | 4.429 (1.758–11.16) | 0.002                 |
| G-5G-A-T                            | 0.010              | 0.009              | 0.000           | 0.314 (0.016–6.225) | 0.553                 |
| G-5G-A-G                            | 0.003              | 0.003              | 0.003           | 2.214 (0.135–36.28) | 0.531                 |
| A-4G-G-T                            | 0.067              | 0.080              | 0.056           | 1.286 (0.648–2.553) | 0.482                 |
| A-4G-G-G                            | 0.329              | 0.313              | 0.324           | 1.836 (1.172–2.877) | 0.008                 |
| A-4G-A-T                            | 0.006              | 0.003              | 0.007           | 4.429 (0.370–50.23) | 0.238                 |
| A-4G-A-G                            | 0.000              | 0.000              | 0.016           | 24.20 (1.307–448.0) | 0.004                 |
| A-5G-G-T                            | 0.027              | 0.000              | 0.051           | 72.60 (4.252–1239)  | <0.0001               |
| A-5G-G-G                            | 0.009              | 0.018              | 0.007           | 0.633 (0.126–3.176) | 0.722                 |
| A-5G-A-T                            | 0.000              | 0.000              | 0.004           | 6.600 (0.263–165.5) | 0.316                 |

Table S3. Cont.

| Haplotype                          | Overall (2n = 710) | Control (2n = 394) | Case (2n = 316) | OR (95% CI)         | p <sup>a</sup> |
|------------------------------------|--------------------|--------------------|-----------------|---------------------|----------------|
| <i>PAI-1 -844/+43/+9785/+11053</i> |                    |                    | -               | -                   | -              |
| G-G-G-T                            | 0.339              | 0.391              | 0.266           | 1.000 (reference)   | -              |
| G-G-G-G                            | 0.122              | 0.118              | 0.135           | 1.677 (1.026–2.743) | 0.043          |
| G-G-A-T                            | 0.017              | 0.025              | 0.000           | 0.087 (0.005–1.505) | 0.018          |
| G-G-A-G                            | 0.007              | 0.010              | 0.000           | 0.203 (0.011–3.822) | 0.301          |
| G-A-G-T                            | 0.047              | 0.029              | 0.090           | 4.667 (2.212–9.846) | <0.0001        |
| G-A-G-G                            | 0.027              | 0.011              | 0.041           | 5.958 (1.883–18.86) | 0.001          |
| G-A-A-T                            | 0.005              | 0.003              | 0.000           | 0.610 (0.025–15.14) | 1.000          |
| G-A-A-G                            | 0.002              | 0.000              | 0.004           | 5.485 (0.221–136.2) | 0.356          |
| A-G-G-T                            | 0.074              | 0.080              | 0.077           | 1.375 (0.760–2.486) | 0.355          |
| A-G-G-G                            | 0.316              | 0.327              | 0.287           | 1.293 (0.886–1.887) | 0.211          |
| A-G-A-T                            | 0.005              | 0.003              | 0.004           | 1.833 (0.113–29.71) | 1.000          |
| A-G-A-G                            | 0.002              | 0.000              | 0.019           | 23.77 (1.322–427.4) | 0.002          |
| A-A-G-T                            | 0.021              | 0.000              | 0.037           | 45.71 (2.671–782.2) | <0.0001        |
| A-A-G-G                            | 0.019              | 0.004              | 0.037           | 22.00 (2.810–172.2) | <0.0001        |
| A-A-A-T                            | 0.000              | 0.000              | 0.005           | 5.485 (0.221–136.2) | 0.356          |
| <i>PAI-1 -675/+43/+9785/+11053</i> |                    |                    | -               | -                   | -              |
| 4G-G-G-T                           | 0.243              | 0.313              | 0.155           | 1.000 (reference)   | -              |
| 4G-G-G-G                           | 0.393              | 0.408              | 0.373           | 1.840 (1.224–2.766) | 0.004          |
| 4G-G-A-T                           | 0.013              | 0.018              | 0.001           | 0.166 (0.009–2.970) | 0.192          |
| 4G-G-A-G                           | 0.012              | 0.012              | 0.020           | 3.012 (0.878–10.33) | 0.090          |
| 4G-A-G-T                           | 0.017              | 0.004              | 0.036           | 27.61 (3.470–219.8) | <0.0001        |
| 4G-A-G-G                           | 0.037              | 0.010              | 0.070           | 13.81 (4.523–42.14) | <0.0001        |
| 4G-A-A-T                           | 0.002              | 0.000              | 0.004           | 7.485 (0.300–187.0) | 0.289          |
| 5G-G-G-T                           | 0.170              | 0.161              | 0.189           | 2.391 (1.473–3.881) | 0.001          |
| 5G-G-G-G                           | 0.043              | 0.035              | 0.050           | 2.896 (1.302–6.322) | 0.011          |
| 5G-G-A-T                           | 0.005              | 0.006              | 0.000           | 0.499 (0.024–10.59) | 1.000          |
| 5G-G-A-G                           | 0.001              | 0.003              | 0.000           | 0.832 (0.033–20.78) | 1.000          |
| 5G-A-G-T                           | 0.055              | 0.027              | 0.090           | 6.390 (2.952–13.83) | <0.0001        |
| 5G-A-G-G                           | 0.006              | 0.003              | 0.006           | 5.020 (0.445–56.67) | 0.204          |
| 5G-A-A-T                           | 0.003              | 0.003              | 0.003           | 2.510 (0.154–40.96) | 0.493          |
| 5G-A-A-G                           | 0.001              | 0.000              | 0.003           | 7.485 (0.300–187.0) | 0.289          |

<sup>a</sup> Fisher's exact test.

**Table S4.** Comparison of genotype frequencies of the *PAI-1* gene 3 site haplotype in the context of OVCF in postmenopausal women and control subjects.

| Haplotype                      | Overall (2n = 710) | Control (2n = 394) | Case (2n = 316) | OR (95% CI)         | p <sup>a</sup> |
|--------------------------------|--------------------|--------------------|-----------------|---------------------|----------------|
| <i>PAI-1</i> -844/-675/+43     |                    |                    |                 |                     |                |
| G-4G-G                         | 0.287              | 0.356              | 0.196           | 1.000 (reference)   | -              |
| G-4G-A                         | 0.032              | 0.010              | 0.059           | 10.73 (3.502–32.85) | <0.0001        |
| G-5G-G                         | 0.197              | 0.188              | 0.207           | 2.014 (1.288–3.148) | 0.002          |
| G-5G-A                         | 0.048              | 0.032              | 0.072           | 3.995 (1.900–8.399) | 0.0002         |
| A-4G-G                         | 0.376              | 0.394              | 0.358           | 1.646 (1.120–2.419) | 0.012          |
| A-4G-A                         | 0.022              | 0.004              | 0.045           | 15.81 (3.485–71.68) | <0.0001        |
| A-5G-G                         | 0.021              | 0.016              | 0.027           | 3.387 (1.155–9.931) | 0.042          |
| A-5G-A                         | 0.017              | 0.000              | 0.035           | 51.70 (2.997–891.9) | <0.0001        |
| <i>PAI-1</i> -844/-675/+9785   |                    |                    |                 |                     |                |
| G-4G-G                         | 0.303              | 0.342              | 0.252           | 1.000 (reference)   | -              |
| G-4G-A                         | 0.016              | 0.024              | 0.006           | 0.375 (0.079–1.780) | 0.335          |
| G-5G-G                         | 0.235              | 0.209              | 0.275           | 1.790 (1.189–2.696) | 0.007          |
| G-5G-A                         | 0.009              | 0.011              | 0.002           | 0.422 (0.046–3.843) | 0.654          |
| A-4G-G                         | 0.387              | 0.392              | 0.381           | 1.315 (0.913–1.895) | 0.165          |
| A-4G-A                         | 0.011              | 0.006              | 0.020           | 5.063 (0.994–25.69) | 0.057          |
| A-5G-G                         | 0.039              | 0.016              | 0.060           | 5.344 (2.048–13.94) | 0.0002         |
| A-5G-A                         | 0.001              | 0.000              | 0.004           | 5.050 (0.203–125.5) | 0.375          |
| <i>PAI-1</i> -844/-675/+11053  |                    |                    |                 |                     |                |
| G-4G-T                         | 0.202              | 0.254              | 0.133           | 1.000 (reference)   | -              |
| G-4G-G                         | 0.114              | 0.114              | 0.121           | 2.011 (1.146–3.529) | 0.021          |
| G-5G-T                         | 0.206              | 0.194              | 0.228           | 2.256 (1.391–3.659) | 0.001          |
| G-5G-G                         | 0.041              | 0.024              | 0.053           | 4.048 (1.712–9.569) | 0.002          |
| A-4G-T                         | 0.072              | 0.083              | 0.062           | 1.443 (0.744–2.798) | 0.302          |
| A-4G-G                         | 0.329              | 0.313              | 0.342           | 2.091 (1.342–3.258) | 0.001          |
| A-5G-T                         | 0.027              | 0.000              | 0.054           | 82.76 (4.862–1409)  | <0.0001        |
| A-5G-G                         | 0.009              | 0.018              | 0.007           | 0.680 (0.136–3.412) | 1.000          |
| <i>PAI-1</i> -844/+43/+9785    |                    |                    |                 |                     |                |
| G-G-G                          | 0.464              | 0.513              | 0.402           | 1.000 (reference)   | -              |
| G-G-A                          | 0.020              | 0.032              | 0.000           | 0.059 (0.003–0.999) | 0.003          |
| G-A-G                          | 0.074              | 0.039              | 0.123           | 4.135 (2.190–7.809) | <0.0001        |
| G-A-A                          | 0.006              | 0.003              | 0.010           | 4.772 (0.491–46.40) | 0.303          |
| A-G-G                          | 0.386              | 0.403              | 0.365           | 1.150 (0.830–1.595) | 0.406          |
| A-G-A                          | 0.011              | 0.006              | 0.022           | 5.567 (1.138–27.23) | 0.032          |
| A-A-G                          | 0.040              | 0.005              | 0.079           | 19.88 (4.628–85.41) | <0.0001        |
| <i>PAI-1</i> -844/+43/+9785    |                    |                    |                 |                     |                |
| G-G-T                          | 0.355              | 0.416              | 0.269           | 1.000 (reference)   | -              |
| G-G-G                          | 0.129              | 0.128              | 0.132           | 1.589 (0.978–2.581) | 0.078          |
| G-A-T                          | 0.052              | 0.031              | 0.084           | 4.341 (2.094–8.988) | <0.0001        |
| G-A-G                          | 0.028              | 0.010              | 0.049           | 7.718 (2.501–23.82) | 0.0002         |
| A-G-T                          | 0.079              | 0.083              | 0.080           | 1.462 (0.817–2.616) | 0.225          |
| A-G-G                          | 0.318              | 0.327              | 0.307           | 1.451 (1.001–2.104) | 0.059          |
| A-A-T                          | 0.021              | 0.000              | 0.045           | 55.80 (3.286–947.3) | <0.0001        |
| A-A-G                          | 0.019              | 0.004              | 0.034           | 21.22 (2.693–167.2) | <0.0001        |
| <i>PAI-1</i> -844/+9785/+11053 |                    |                    |                 |                     |                |
| G-G-T                          | 0.388              | 0.420              | 0.357           | 1.000 (reference)   | -              |
| G-G-G                          | 0.146              | 0.129              | 0.172           | 1.546 (0.984–2.428) | 0.065          |
| G-A-T                          | 0.021              | 0.028              | 0.000           | 0.063 (0.004–1.087) | 0.004          |
| G-A-G                          | 0.009              | 0.010              | 0.006           | 0.730 (0.131–4.055) | 1.000          |
| A-G-T                          | 0.092              | 0.080              | 0.109           | 1.551 (0.905–2.659) | 0.128          |
| A-G-G                          | 0.338              | 0.331              | 0.331           | 1.179 (0.830–1.676) | 0.371          |
| A-A-T                          | 0.007              | 0.003              | 0.012           | 5.841 (0.644–52.97) | 0.164          |
| A-A-G                          | 0.000              | 0.000              | 0.013           | 13.12 (0.699–246.3) | 0.029          |

Table S4. Cont.

| Haplotype                      | Overall (2n = 710) | Control (2n = 394) | Case (2n = 316) | OR (95% CI)         | p <sup>a</sup> |
|--------------------------------|--------------------|--------------------|-----------------|---------------------|----------------|
| <i>PAI-1</i> -675/+43/+9785    |                    |                    |                 |                     |                |
| 4G-G-G                         | 0.637              | 0.720              | 0.529           | 1.000 (reference)   | -              |
| 4G-G-A                         | 0.026              | 0.031              | 0.022           | 0.992 (0.383–2.570) | 1.000          |
| 4G-A-G                         | 0.052              | 0.014              | 0.102           | 10.88 (4.159–28.48) | <0.0001        |
| 4G-A-A                         | 0.002              | 0.000              | 0.005           | 8.493 (0.401–178.1) | 0.139          |
| 5G-G-G                         | 0.212              | 0.197              | 0.237           | 1.656 (1.143–2.401) | 0.010          |
| 5G-G-A                         | 0.005              | 0.007              | 0.000           | 0.243 (0.012–4.730) | 0.301          |
| 5G-A-G                         | 0.062              | 0.030              | 0.100           | 4.535 (2.273–9.047) | <0.0001        |
| 5G-A-A                         | 0.003              | 0.003              | 0.005           | 1.701 (0.106–27.39) | 1.000          |
| <i>PAI-1</i> -675/+9785/+11053 |                    |                    |                 |                     |                |
| 4G-G-T                         | 0.257              | 0.331              | 0.159           | 1.000 (reference)   | -              |
| 4G-G-G                         | 0.405              | 0.419              | 0.394           | 1.969 (1.319–2.939) | 0.001          |
| 4G-A-T                         | 0.018              | 0.004              | 0.038           | 31.44 (3.982–248.3) | <0.0001        |
| 4G-A-G                         | 0.037              | 0.010              | 0.068           | 13.76 (4.497–42.08) | <0.0001        |
| 5G-G-T                         | 0.176              | 0.166              | 0.189           | 2.418 (1.498–3.904) | 0.0002         |
| 5G-G-G                         | 0.042              | 0.038              | 0.046           | 2.620 (1.193–5.753) | 0.019          |
| 5G-A-T                         | 0.057              | 0.030              | 0.092           | 6.332 (2.998–13.37) | <0.0001        |
| 5G-A-G                         | 0.009              | 0.003              | 0.014           | 10.48 (1.143–96.10) | 0.026          |
| <i>PAI-1</i> +43/+9785/+11053  |                    |                    |                 |                     |                |
| G-G-T                          | 0.417              | 0.476              | 0.348           | 1.000 (reference)   | -              |
| G-G-G                          | 0.432              | 0.440              | 0.418           | 1.304 (0.941–1.808) | 0.115          |
| G-A-T                          | 0.017              | 0.023              | 0.000           | 0.090 (0.005–1.559) | 0.029          |
| G-A-G                          | 0.014              | 0.015              | 0.022           | 1.994 (0.653–6.085) | 0.249          |
| A-G-T                          | 0.069              | 0.028              | 0.124           | 6.060 (2.981–12.32) | <0.0001        |
| A-G-G                          | 0.045              | 0.015              | 0.078           | 7.121 (2.833–17.90) | <0.0001        |
| A-A-T                          | 0.004              | 0.003              | 0.005           | 3.418 (0.306–38.16) | 0.558          |
| A-A-G                          | 0.002              | 0.000              | 0.005           | 8.529 (0.406–179.4) | 0.139          |

<sup>a</sup> Fisher's exact test.

**Table S5.** Comparison of genotype frequencies of the *PAI-1* gene 2 site haplotype in the context OVCF in postmenopausal women and control subjects.

| Haplotype                 | Overall (2n = 710) | Control (2n = 394) | Case (2n = 316) | OR (95% CI)         | p <sup>a</sup> |
|---------------------------|--------------------|--------------------|-----------------|---------------------|----------------|
| <i>PAI-1</i> -844/-675    |                    |                    |                 |                     |                |
| G-4G                      | 0.319              | 0.366              | 0.258           | 1.000 (reference)   | -              |
| G-5G                      | 0.244              | 0.22               | 0.277           | 1.798 (1.202–2.689) | 0.004          |
| A-4G                      | 0.398              | 0.398              | 0.401           | 1.438 (1.004–2.059) | 0.057          |
| A-5G                      | 0.039              | 0.016              | 0.065           | 5.926 (2.287–15.36) | <0.0001        |
| <i>PAI-1</i> -844/+43     |                    |                    |                 |                     |                |
| G-G                       | 0.483              | 0.545              | 0.402           | 1.000 (reference)   | -              |
| G-A                       | 0.08               | 0.041              | 0.133           | 4.444 (2.399–8.231) | <0.0001        |
| A-G                       | 0.397              | 0.409              | 0.386           | 1.283 (0.930–1.770) | 0.14           |
| A-A                       | 0.039              | 0.005              | 0.079           | 21.16 (4.928–90.87) | <0.0001        |
| <i>PAI-1</i> -844/+9785   |                    |                    |                 |                     |                |
| G-G                       | 0.538              | 0.552              | 0.527           | 1.000 (reference)   | -              |
| G-A                       | 0.025              | 0.035              | 0.008           | 0.280 (0.079–0.991) | 0.044          |
| A-G                       | 0.425              | 0.408              | 0.442           | 1.137 (0.839–1.540) | 0.439          |
| A-A                       | 0.011              | 0.006              | 0.024           | 4.575 (0.938–22.32) | 0.048          |
| <i>PAI-1</i> -844/+11053  |                    |                    |                 |                     |                |
| G-T                       | 0.409              | 0.448              | 0.359           | 1.000 (reference)   | -              |
| G-G                       | 0.154              | 0.139              | 0.175           | 1.544 (0.992–2.402) | 0.055          |
| A-T                       | 0.098              | 0.083              | 0.119           | 1.731 (1.024–2.927) | 0.044          |
| A-G                       | 0.339              | 0.331              | 0.347           | 1.306 (0.924–1.847) | 0.134          |
| <i>PAI-1</i> -675/+43     |                    |                    |                 |                     |                |
| 4G-G                      | 0.663              | 0.75               | 0.552           | 1.000 (reference)   | -              |
| 4G-A                      | 0.054              | 0.014              | 0.106           | 11.57 (4.440–30.14) | <0.0001        |
| 5G-G                      | 0.218              | 0.204              | 0.236           | 1.595 (1.105–2.301) | 0.014          |
| 5G-A                      | 0.066              | 0.032              | 0.106           | 4.318 (2.213–8.428) | <0.0001        |
| <i>PAI-1</i> -675/+9785   |                    |                    |                 |                     |                |
| 4G-G                      | 0.69               | 0.734              | 0.635           | 1.000 (reference)   | -              |
| 4G-A                      | 0.027              | 0.03               | 0.023           | 0.839 (0.325–2.168) | 0.815          |
| 5G-G                      | 0.274              | 0.226              | 0.334           | 1.696 (1.213–2.371) | 0.002          |
| 5G-A                      | 0.01               | 0.011              | 0.008           | 1.078 (0.239–4.872) | 1              |
| <i>PAI-1</i> -675/+11053  |                    |                    |                 |                     |                |
| 4G-T                      | 0.274              | 0.334              | 0.197           | 1.000 (reference)   | -              |
| 4G-G                      | 0.443              | 0.43               | 0.462           | 1.839 (1.265–2.675) | 0.002          |
| 5G-T                      | 0.233              | 0.196              | 0.281           | 2.461 (1.602–3.780) | <0.0001        |
| 5G-G                      | 0.05               | 0.04               | 0.061           | 2.528 (1.218–5.249) | 0.013          |
| <i>PAI-1</i> +43/+9785    |                    |                    |                 |                     |                |
| G-G                       | 0.85               | 0.916              | 0.767           | 1.000 (reference)   | -              |
| G-A                       | 0.031              | 0.038              | 0.021           | 0.696 (0.280–1.733) | 0.511          |
| A-G                       | 0.114              | 0.043              | 0.202           | 5.616 (3.211–9.823) | <0.0001        |
| A-A                       | 0.006              | 0.003              | 0.011           | 4.475 (0.463–43.30) | 0.308          |
| <i>PAI-1</i> +43/+11053   |                    |                    |                 |                     |                |
| G-T                       | 0.434              | 0.499              | 0.348           | 1.000 (reference)   | -              |
| G-G                       | 0.446              | 0.455              | 0.44            | 1.391 (1.008–1.919) | 0.05           |
| A-T                       | 0.073              | 0.031              | 0.13            | 6.119 (3.086–12.13) | <0.0001        |
| A-G                       | 0.047              | 0.014              | 0.082           | 7.761 (3.099–19.44) | <0.0001        |
| <i>PAI-1</i> +9785/+11053 |                    |                    |                 |                     |                |
| G-T                       | 0.486              | 0.504              | 0.466           | 1.000 (reference)   | -              |
| G-G                       | 0.478              | 0.455              | 0.502           | 1.202 (0.889–1.626) | 0.249          |
| A-T                       | 0.021              | 0.026              | 0.012           | 0.542 (0.167–1.761) | 0.411          |
| A-G                       | 0.015              | 0.014              | 0.02            | 1.354 (0.428–4.283) | 0.768          |

<sup>a</sup> Fisher's exact test.



**Table S6.** Stratified analysis of *PAI-1* polymorphisms for hypertension, diabetes mellitus, 25-OH vit. D, vit. B<sub>12</sub>, folate, and homocysteine levels.

| Characteristics                   | <i>PAI-1</i> -844 GA + AA |          | <i>PAI-1</i> -675 5G5G |          | <i>PAI-1</i> 43 GA + AA |          | <i>PAI-1</i> 9785 GA + AA |          | <i>PAI-1</i> 11053 TG + GG |          |
|-----------------------------------|---------------------------|----------|------------------------|----------|-------------------------|----------|---------------------------|----------|----------------------------|----------|
|                                   | AOR (95% CI) *            | <i>p</i> | AOR (95% CI) *         | <i>p</i> | AOR (95% CI) *          | <i>p</i> | AOR (95% CI) *            | <i>p</i> | AOR (95% CI) *             | <i>p</i> |
| Hypertension (-)                  | 2.057 (1.053–4.019)       | 0.035    | 1.156 (0.326–4.098)    | 0.822    | 2.664 (0.977–7.260)     | 0.056    | 0.708 (0.196–2.563)       | 0.599    | 1.127 (0.564–2.254)        | 0.735    |
| Hypertension (+)                  | 1.097 (0.528–2.276)       | 0.804    | 8.013 (1.906–33.69)    | 0.005    | 1.555 (0.550–4.398)     | 0.405    | 1.467 (0.428–5.036)       | 0.542    | 1.858 (0.803–4.299)        | 0.148    |
| Diabetes mellitus (-)             | 1.721 (1.010–2.932)       | 0.046    | 5.058 (1.655–15.46)    | 0.005    | 2.050 (0.954–4.406)     | 0.066    | 0.916 (0.364–2.304)       | 0.852    | 1.303 (0.745–2.280)        | 0.354    |
| Diabetes mellitus (+)             | 0.883 (0.231–3.374)       | 0.856    | 0.589 (0.082–4.214)    | 0.598    | 1.620 (0.217–12.090)    | 0.638    | 8.208 (0.264–255.001)     | 0.23     | 2.849 (0.502–16.185)       | 0.237    |
| 25-OH vit. D ≥ 30 ng/mL           | 0.440 (0.108–1.791)       | 0.252    | 19.126 (0.998–366.8)   | 0.05     | 2.910 (0.510–16.618)    | 0.23     | N/A                       | 0.998    | 0.664 (0.148–2.978)        | 0.592    |
| 25-OH vit. D < 30 ng/mL           | 1.643 (0.780–3.461)       | 0.192    | 1.208 (0.200–7.306)    | 0.837    | 0.853 (0.272–2.680)     | 0.786    | 0.825 (0.169–4.020)       | 0.812    | 1.245 (0.563–2.751)        | 0.589    |
| Vit. B <sub>12</sub> > 400 pg/mL  | 1.314 (0.650–2.654)       | 0.447    | 1.800 (0.403–8.039)    | 0.441    | 1.968 (0.772–5.017)     | 0.156    | 0.339 (0.042–2.737)       | 0.31     | 1.113 (0.519–2.387)        | 0.784    |
| Vit. B <sub>12</sub> ≤ 400 pg/mL  | 1.042 (0.410–2.652)       | 0.931    | 3.604 (0.590–22.04)    | 0.165    | 1.249 (0.309–5.039)     | 0.755    | 1.930 (0.383–9.727)       | 0.425    | 1.187 (0.403–3.490)        | 0.756    |
| Folate > 4.40 nmol/L <sup>a</sup> | 1.774 (1.016–3.096)       | 0.044    | 2.397 (0.876–6.558)    | 0.089    | 1.737 (0.802–3.762)     | 0.162    | 0.706 (0.243–2.050)       | 0.522    | 1.476 (0.818–2.665)        | 0.196    |
| Folate ≤ 4.40 nmol/L <sup>a</sup> | 1.230 (0.310–4.885)       | 0.768    | N/A                    | N/A      | 7.406 (0.716–76.644)    | 0.093    | N/A                       | N/A      | 0.933 (0.207–4.210)        | 0.928    |
| tHcy < 12.41 μmol/L <sup>b</sup>  | 1.512 (0.393–5.822)       | 0.548    | 5.543 (0.566–54.29)    | 0.141    | 1.812 (0.842–3.900)     | 0.128    | 1.794 (0.145–22.18)       | 0.649    | 0.670 (0.150–2.991)        | 0.599    |
| tHcy ≥ 12.41 μmol/L <sup>b</sup>  | 1.590 (0.929–2.720)       | 0.091    | 2.394 (0.839–6.832)    | 0.103    | 5.133 (0.513–51.334)    | 0.164    | 0.860 (0.312–2.369)       | 0.77     | 1.581 (0.884–2.829)        | 0.123    |

\* 95% CI indicates 95% confidence interval. Adjusted by age, hypertension, diabetes mellitus; <sup>a</sup> 4.40 nmol/L is based on the bottom 15% of the folate level in patients and control group; <sup>b</sup> 12.41 μmol/L is based on the top. Abbreviations: AOR, adjusted odds ratio; N/A, not applicable.

**Table S7.** Combined effects of *PAI-1* genotype and homocysteine and folate levels on OVCF risk in postmenopausal women.

| Genotypes                     | Folate ><br>4.40 nmol/L <sup>a</sup> | Folate ≤<br>4.40 nmol/L <sup>a</sup> | tHcy <<br>12.41 μmol/L <sup>b</sup> | tHcy ≥ 12.41<br>μmol/L <sup>b</sup> |
|-------------------------------|--------------------------------------|--------------------------------------|-------------------------------------|-------------------------------------|
| <i>PAI-1</i> -844 GG          | 1.000 (reference)                    | 3.091 (0.903–10.580)                 | 1.000 (reference)                   | 1.972 (0.587–6.628)                 |
| <i>PAI-1</i> -844 GA + AA     | 1.774 (1.016–3.096)                  | 2.784 (1.172–6.613)                  | 1.590 (0.929–2.720)                 | 2.522 (1.074–5.921)                 |
| <i>PAI-1</i> -675 4G4G        | 1.000 (reference)                    | 1.627 (0.591–4.481)                  | 1.000 (reference)                   | 1.394 (0.590–3.295)                 |
| <i>PAI-1</i> -675 4G5G + 5G5G | 1.615 (0.981–2.660)                  | 3.625 (1.404–9.362)                  | 1.631 (0.994–2.674)                 | 3.571 (1.212–10.52)                 |
| <i>PAI-1</i> 43 GG            | 1.000 (reference)                    | 1.456 (0.716–2.960)                  | 1.000 (reference)                   | 1.812 (0.842–3.900)                 |
| <i>PAI-1</i> 43 GA + AA       | 1.737 (0.802–3.762)                  | 9.247 (1.049–81.51)                  | 1.450 (0.741–2.834)                 | 8.000 (0.865–73.99)                 |
| <i>PAI-1</i> 9785 GG          | 1.000 (reference)                    | 1.617 (0.816–3.203)                  | 1.000 (reference)                   | 1.608 (0.835–3.095)                 |
| <i>PAI-1</i> 9785 GA + AA     | 0.706 (0.243–2.050)                  | N/A                                  | 0.860 (0.312–2.369)                 | 2.780 (0.237–32.58)                 |
| <i>PAI-1</i> 11053 TT         | 1.000 (reference)                    | 2.607 (0.591–11.49)                  | 1.000 (reference)                   | 3.598 (0.873–14.83)                 |
| <i>PAI-1</i> 11053 TG + GG    | 1.476 (0.818–2.665)                  | 2.468 (1.035–5.887)                  | 1.581 (0.884–2.829)                 | 2.275 (0.952–5.440)                 |

<sup>a</sup> 4.40 nmol/L is based on the bottom 15% folate level in patients and control group; <sup>b</sup> 12.41 μmol/L is based on the top 15% homocysteine level in patients and control group. Abbreviations: N/A, not applicable.

**Table S8.** The BMD, vit. B<sub>12</sub>, 25-OH vit. D, osteocalcin, and DPD levels according to *PAI-1* gene polymorphisms in OVCF patients.

| Genotypes            | BMD (g/cm <sup>2</sup> ) |        | Vit. B <sub>12</sub> (pmol/L) |        | 25-Vit. D (ng/mL) |        | Osteocalcin (ng/mL) |        | DPD (nMDP/mMcre) |        |
|----------------------|--------------------------|--------|-------------------------------|--------|-------------------|--------|---------------------|--------|------------------|--------|
|                      | Mean ± SD                | CV (%) | Mean ± SD                     | CV (%) | Mean ± SD         | CV (%) | Mean ± SD           | CV (%) | Mean ± SD        | CV (%) |
| <i>PAI-1</i> -844    | -                        | -      | -                             | -      | -                 | -      | -                   | -      | -                | -      |
| GG                   | -3.19 ± 0.84             | 26.3   | 720.12 ± 668.90               | 92.9   | 28.23 ± 26.10     | 92.5   | 11.78 ± 10.67       | 90.6   | 7.15 ± 5.14      | 71.9   |
| GA                   | -2.90 ± 1.01             | 34.8   | 798.06 ± 894.35               | 112.1  | 25.42 ± 21.08     | 82.9   | 6.34 ± 3.91         | 61.7   | 7.68 ± 4.59      | 59.8   |
| AA                   | -3.44 ± 0.94             | 27.3   | 717.77 ± 368.68               | 51.4   | 14.67 ± 11.65     | 79.4   | 8.27 ± 4.19         | 50.7   | 11.92 ± 8.14     | 68.3   |
| <i>p</i>             | 0.045                    | -      | 0.688                         | -      | 0.15              | -      | 0.085               | -      | 0.207            | -      |
| GG vs. GA + AA       | -3.02 ± 1.01             | 33.4   | 774.47 ± 777.35               | 100.4  | 22.32 ± 19.37     | 86.8   | 6.77 ± 3.99         | 58.9   | 8.62 ± 5.67      | 65.8   |
| <i>p</i>             | 0.388                    | -      | 0.571                         | -      | 0.291             | -      | 0.035 *             | -      | 0.516            | -      |
| <i>PAI-1</i> -675    | -                        | -      | -                             | -      | -                 | -      | -                   | -      | -                | -      |
| 4G4G                 | -3.03 ± 0.84             | 27.7   | 707.41 ± 477.10               | 67.4   | 20.86 ± 22.43     | 107.5  | 10.30 ± 8.96        | 87     | 7.50 ± 4.44      | 59.2   |
| 4G5G                 | -3.12 ± 1.08             | 34.6   | 787.06 ± 861.90               | 109.5  | 25.88 ± 21.17     | 81.8   | 6.59 ± 3.56         | 54     | 7.62 ± 4.91      | 64.4   |
| 5G5G                 | -2.95 ± 0.97             | 32.9   | 1041.54 ± 1634.34             | 156.9  | 32.83 ± 16.14     | 49.2   | 6.05 ± 3.69         | 61     | 13.85 ± 9.11     | 65.8   |
| <i>p</i>             | 0.772                    | -      | 0.254                         | -      | 0.406             | -      | 0.177               | -      | 0.098            | -      |
| 4G4G vs. 4G5G + 5G5G | -3.09 ± 1.05             | 34.0   | 814.18 ± 966.52               | 118.7  | 26.77 ± 20.55     | 76.8   | 6.46 ± 3.53         | 54.6   | 8.75 ± 6.12      | 69.9   |
| <i>p</i>             | 0.72                     | -      | 0.241                         | -      | 0.244             | -      | 0.062               | -      | 0.525            | -      |
| <i>PAI-1</i> +43     | -                        | -      | -                             | -      | -                 | -      | -                   | -      | -                | -      |
| GG                   | -3.07 ± 0.99             | 32.2   | 761.07 ± 772.88               | 101.6  | 23.47 ± 21.97     | 93.6   | 7.98 ± 6.73         | 84.3   | 8.42 ± 4.01      | 47.6   |
| GA                   | -3.10 ± 0.90             | 29.0   | 745.63 ± 362.05               | 48.6   | 28.93 ± 20.88     | 72.2   | 7.34 ± 2.19         | 29.8   | 7.50 ± 11.88     | 158.4  |
| AA                   | -2.50 ± 0.00             | 0.0    | 433.33 ± 221.67               | 51.2   | 21.58 ± 9.79      | 45.4   | -                   | -      | -                | -      |
| <i>p</i>             | 0.709                    | -      | 0.748                         | -      | 0.79              | -      | 0.835               | -      | 0.736            | -      |
| GG vs. GA + AA       | -3.04 ± 0.88             | 28.9   | 710.93 ± 360.20               | 50.7   | 27.46 ± 18.96     | 69     | 7.34 ± 2.19         | 29.8   | 7.50 ± 11.88     | 158.4  |
| <i>p</i>             | 0.906                    | -      | 0.74                          | -      | 0.589             | -      | 0.835               | -      | 0.736            | -      |
| <i>PAI-1</i> +9785   | -                        | -      | -                             | -      | -                 | -      | -                   | -      | -                | -      |
| GG                   | -3.05 ± 0.92             | 30.2   | 762.75 ± 763.15               | 100.1  | 24.39 ± 21.69     | 88.9   | 7.83 ± 6.30         | 80.5   | 8.28 ± 5.67      | 68.5   |
| GA                   | -3.24 ± 1.58             | 48.8   | 664.53 ± 317.31               | 47.7   | 10.80 ± 0.01      | 0.1    | 9.20 ± 9.33         | 101.4  | 8.30 ± 2.26      | 27.2   |
| AA                   | -                        | -      | 627                           | -      | -                 | -      | -                   | -      | -                | -      |
| <i>p</i>             | 0.564                    | -      | 0.857                         | -      | 0.382             | -      | 0.77                | -      | 0.997            | -      |
| GG vs. GA + AA       | -3.24 ± 1.58             | 48.8   | 662.44 ± 307.96               | 46.5   | 10.80 ± 0.01      | 0.1    | 9.20 ± 9.33         | 101.4  | 8.30 ± 2.26      | 27.2   |
| <i>p</i>             | 0.564                    | -      | 0.58                          | -      | 0.382             | -      | 0.77                | -      | 0.997            | -      |

Table S8. Cont.

| Genotypes           | BMD (g/cm <sup>2</sup> ) |        | Vit. B <sub>12</sub> (pmol/L) |        | 25-Vit. D (ng/mL) |        | Osteocalcin (ng/mL) |        | DPD (nMDP/mMcre) |        |
|---------------------|--------------------------|--------|-------------------------------|--------|-------------------|--------|---------------------|--------|------------------|--------|
|                     | Mean ± SD                | CV (%) | Mean ± SD                     | CV (%) | Mean ± SD         | CV (%) | Mean ± SD           | CV (%) | Mean ± SD        | CV (%) |
| <i>PAI-1</i> +11053 | -                        | -      | -                             | -      | -                 | -      | -                   | -      | -                | -      |
| TT                  | -3.27 ± 0.88             | 26.9   | 777.10 ± 751.91               | 96.8   | 25.49 ± 15.97     | 62.7   | 5.91 ± 2.84         | 48.1   | 12.15 ± 7.79     | 64.1   |
| TG                  | -2.99 ± 0.98             | 32.8   | 684.05 ± 485.48               | 71     | 23.90 ± 24.69     | 103.3  | 8.92 ± 8.47         | 95     | 6.54 ± 4.56      | 69.7   |
| GG                  | -3.07 ± 1.01             | 32.9   | 891.56 ± 1104.54              | 123.9  | 23.06 ± 19.83     | 86     | 8.14 ± 3.72         | 45.7   | 8.33 ± 3.20      | 38.4   |
| <i>p</i>            | 0.464                    | -      | 0.181                         | -      | 0.945             | -      | 0.46                | -      | 0.053            | -      |
| TT vs. TG + GG      | -3.02 ± 0.99             | 32.8   | 748.70 ± 739.61               | 98.8   | 23.60 ± 22.92     | 97.1   | 8.66 ± 7.12         | 82.2   | 7.14 ± 4.18      | 58.5   |
| <i>p</i>            | 0.234                    | -      | 0.785                         | -      | 0.759             | -      | 0.225               | -      | 0.022            | -      |

Note: BMD, bone mineral density; Vit. B<sub>12</sub>, plasma vitamin B<sub>12</sub>; 25-Vit. D, 25-OH (hydroxyl) vitamin D; DPD, Deoxypyridinoline; SD, standard deviation; CV, between-person coefficient of variation; \* Analysis was performed by Kruskal–Wallis test in the differences of biochemical parameters between *PAI-1* gene polymorphisms in OVCF women.

Table S9. The polymerase chain reaction (PCR) restriction fragment length polymorphism (RFLP) assay.

| SNPs                | Polymorphism | Region   | rs #      | Forward Primer (5'-3')                  | Reverse Primer (5'-3')                | Restriction Enzyme * |
|---------------------|--------------|----------|-----------|-----------------------------------------|---------------------------------------|----------------------|
| <i>PAI-1</i> -844   | G > A        | 5'-UTR   | rs2227631 | 5'-CAG GCT CCC ACT GAT TCT AC-3'        | 5'-GAG GGC TCT CTT GTG TCA AC-3'      | <i>Xho</i> I         |
| <i>PAI-1</i> -675   | 4G > 5G      | 5'-UTR   | rs1799889 | 5'-CCA ACA GAG GAC TCT TGG TC-3'        | 5'-CAC AGA GAG AGT CTG GCC ACG-3'     | <i>Bsl</i> I         |
| <i>PAI-1</i> +43    | G > A        | Exon 2   | rs6092    | 5'-TGT CTT CCA GAA CGA TTC CTT CAC C-3' | 5'-GTT GTC AGC TGG AGC ATG GCC-3'     | <i>Psh</i> A I       |
| <i>PAI-1</i> +9785  | G > A        | Intron 7 | rs2227694 | 5'-TTA GCC AGG CAT GGT GGC ATG-3'       | 5'-CGG GCT GAG ACT ATG ACA GCT GC-3'  | <i>Aci</i> I         |
| <i>PAI-1</i> +11053 | T > G        | 3'-UTR   | rs7242    | 5'-GCT GGG CAC GCA TCT GGC-3'           | 5'-TCT CCC TCC CCA GAA ACA GTG TGC-3' | <i>Hae</i> III       |

\* All of the restriction enzymes were available from New England Biolabs (MA, USA) and we used the reaction conditions recommended by the instructions.
